# Supplementary material for: 1T-CrO2monolayer: a high-temperature Dirac half-metal for high-speed spintronics
Source: Royal Society of Chemistry journal article supplement (doi:10.1039/d0na00884b), 2021-01-01
Supplement: d0na00884b1.pdf [file d0na00884b1.pdf]

Electronic Supplementary Information for

## 1T-CrO<sub>2</sub> Monolayer: A High-Temperature Dirac Half-Metal for High-Speed Spintronics

Shenda He,<sup>1</sup> Pan Zhou,<sup>1</sup> Yi Yang,<sup>2,\*</sup> Wei Wang,<sup>1</sup> and L. Z. Sun<sup>1,†</sup>

<sup>1</sup>Hunan Provincial Key Laboratory of Thin Film Materials and Devices,  
School of Material Sciences and Engineering, Xiangtan University, Xiangtan 411105, China  
<sup>2</sup>School of Material Sciences and Engineering, Xiangtan University, Xiangtan 411105, China

(Dated: January 11, 2021)

### I. SNAPSHOT OF 1T-CrO<sub>2</sub> AFTER PERFORMING AIMD SIMULATIONS

We perform the molecular dynamics simulation in 300 K and the snapshots are presented in the following figures. We find the 2D CrO<sub>2</sub> can still preserved under this temperature. We further perform the molecular dynamics simulation in 600 K and the results are presented in the following Figure S1(b)(c). We find the 2D CrO<sub>2</sub> can also keep well under this temperature.

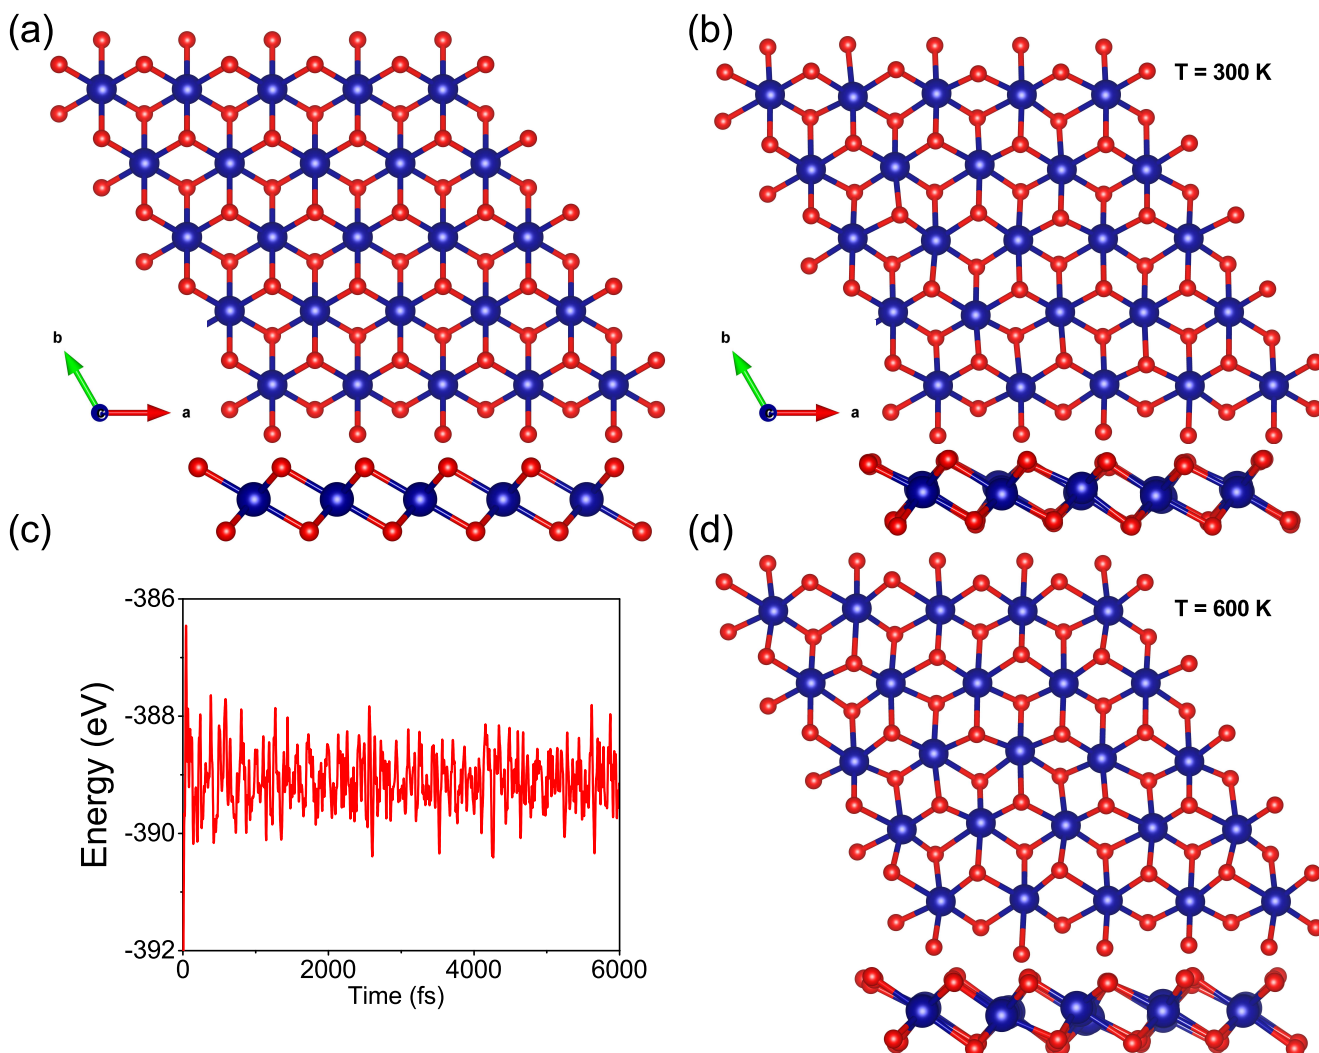

Figure S1: Snapshots of 1T-CrO<sub>2</sub> before and after performing AIMD Simulations and energy evolution of 600 K.

## II. SYMMETRY OPERATORS OF 1T-CrO<sub>2</sub> AND ITS COUNTERPART IN FIRST BRILLOUIN ZONE.

For 1T-CrO<sub>2</sub>, the point group of K or K' are  $C_{3v}$ , and the  $C_3$  operator in this group protect the Dirac point  $D_1$  in Figure 4(a) of main manuscript. The operator  $C_2$  with the rotation axis  $\Gamma$ -K or  $\Gamma$ -K' protect the Dirac point  $D_2$ .

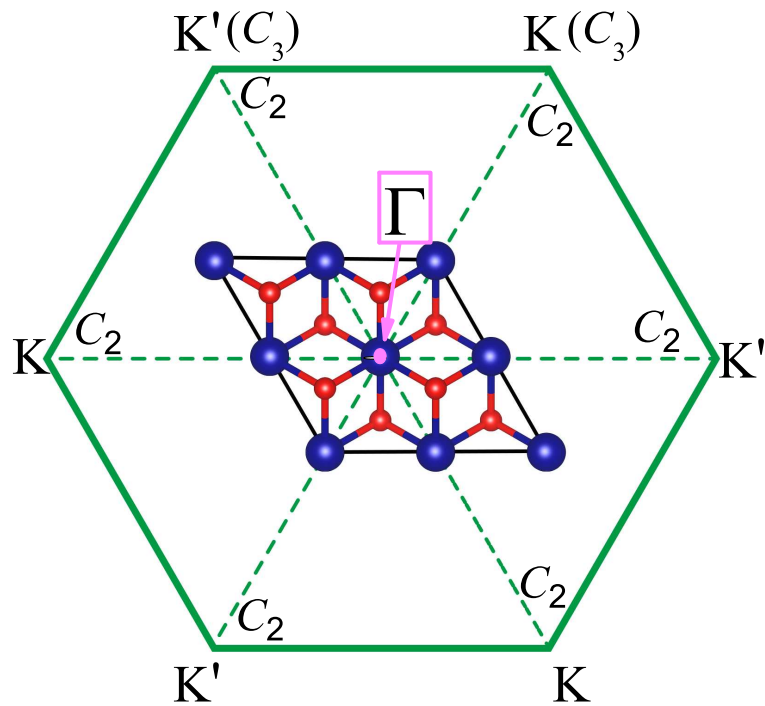

Figure S2: Symmetry operators of 1T-CrO<sub>2</sub> and its counterpart in first Brillouin zone.

### III. ENERGY BAND STRUCTURE WITH $\pm 4\%$ IN-PLANE EXTERNAL STRAIN.

The energy band structures of 1T-CrO<sub>2</sub> with the  $\pm 4\%$  biaxial strain are shown in Figure S3. We find the Dirac cones are still preserved near the Fermi level under external strain.

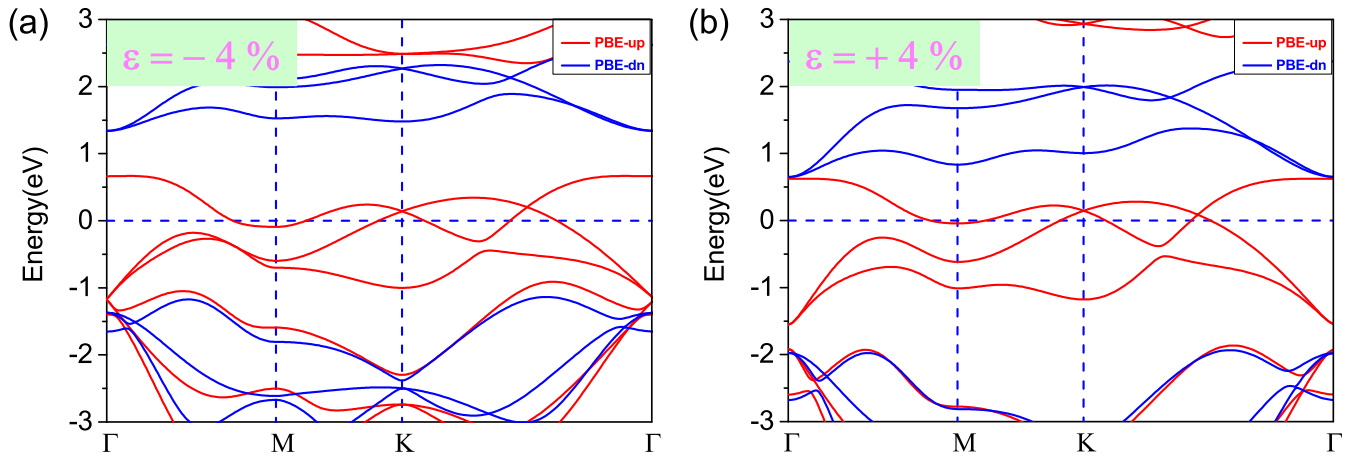

Figure S3: Band structures of 1T-CrO<sub>2</sub> under the biaxial strain  $\pm 4\%$ .

#### IV. ENERGY BAND STRUCTURE WITH DIFFERENT HUBBARD U

To estimate the correlation effects to our electronic state, we calculate the energy band structure with GGA +  $U$  method. We chose a broad range of  $U_{eff}$  from 0 eV to 5 eV to allow a detailed examination of the correlation effects on electronic structure of this system. The results are presented in Figure S4. We find the DHM characteristics of 1T-CrO<sub>2</sub> monolayer is robust to the electronic correlation effect.

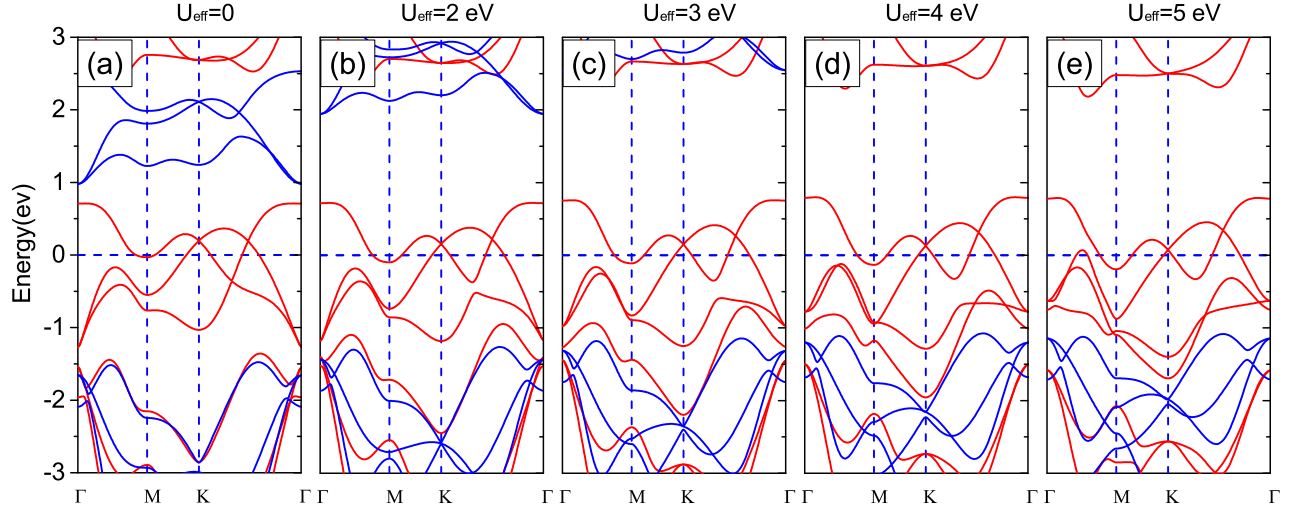

Figure S4: Band structure from DFT +  $U$ . (a)-(e) represent the spin-polarized energy bands structure with  $U_{eff} = 0, 2, 3, 4$  and 5 eV.

## V. MAGNETIC ORDER AND $T_c$ UNDER IN-PLANE EXTERNAL STRAINS

The exchange constant  $J$  should depend on strain because it can change the interactions between different atoms. In figure S5, we present the values of  $J$  with different biaxial strains and corresponding Curie temperatures from Monte Carlo simulations. We find the magnetic ground states of 1T-CrO<sub>2</sub> always keep ferromagnetic in the range -10% to 10%. No obvious change is observed for the the values of  $J$  and Curie temperature between -5% and 10%. A evident decrease happen from -5% to -10% for the values of  $J$ .

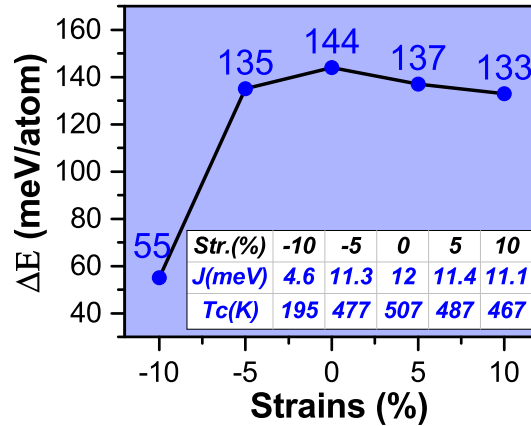

Figure S5: The  $\Delta E$  under in-plane biaxial external strains and it's corresponding  $J$  and  $T_c$  of FM states.

## VI. RELATIONSHIPS OF STRESS AND STRAINS

The stress-strain diagram under only tensile strains. The stress is suddenly changed at the strain of 20%. It is indicated that 20% is the elastic limit of 2D  $\text{CrO}_2$ . That is to say this material can keep its original stable structure when the strain is not beyond 20%.

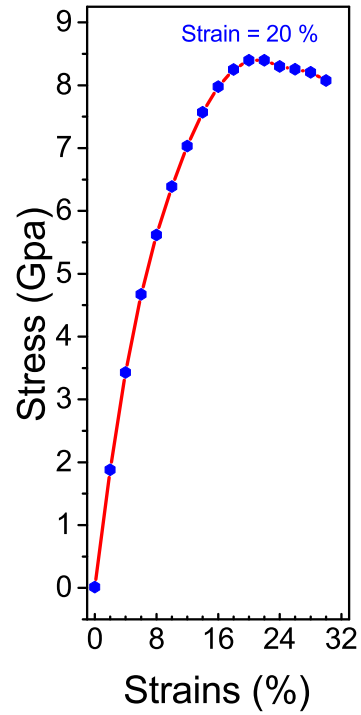

Figure S6: Stress-strain diagram of 1T- $\text{CrO}_2$ .

---

\* Electronic address: yangyi@xtu.edu.cn

† Electronic address: lzsun@xtu.edu.cn
